# Supplementary material
Source: publisher site journal article supplement (https://www.dovepress.com/article/445450)
Supplement: Supplementary file 1 [file get_supplementary_file.php]

# Appendix A: PRISMA Reporting Checklist

| **Section and topic** | **Item #** | **Checklist item** | **Location where item is reported** |
| --- | --- | --- | --- |
| Title | 1 | Identify the report as a systematic review. | Page 1 |
| Abstract | 2 | See the PRISMA 2020 for Abstracts checklist | N/A |
| Rationale | 3 | Describe the rationale for the review in the context of existing knowledge. | Introduction: pages 2-3 |
| Objectives | 4 | Provide an explicit statement of the objective(s) or question(s) the review addresses. | Introduction: page 3 |
| Eligibility criteria | 5 | Specify the inclusion and exclusion criteria for the review and how studies were grouped for the syntheses. | Inclusion critiera: page 4 |
| Information sources | 6 | Specify all databases, registers, websites, organisations, reference lists and other sources searched or consulted to identify studies. Specify the date when each source was last searched or consulted. | Search strategy: pages 3-4 |
| Search strategy | 7 | Present the full search strategies for all databases, registers and websites, including any filters and limits used. | Search strategy: pages 3-4 |
| Selection process | 8 | Specify the methods used to decide whether a study met the inclusion criteria of the review, including how many reviewers screened each record and each report retrieved, whether they worked independently, and if applicable, details of automation tools used in the process. | Study selection: page 5 |
| Data collection process | 9 | Specify the methods used to collect data from reports, including how many reviewers collected data from each report, whether they worked independently, any processes for obtaining or confirming data from study investigators, and if applicable, details of automation tools used in the process. | Data extraction: page 5 |
| Data items | 10a | List and define all outcomes for which data were sought. Specify whether all results that were compatible with each outcome domain in each study were sought (e.g. for all measures, time points, analyses), and if not, the methods used to decide which results to collect. | Data extraction: page 5 |
| 10b | List and define all other variables for which data were sought (e.g. participant and intervention characteristics, funding sources). Describe any assumptions made about any missing or unclear information. | Data extraction: page 5 |
| Study risk of bias assessment | 11 | Specify the methods used to assess risk of bias in the included studies, including details of the tool(s) used, how many reviewers assessed each study and whether they worked independently, and if applicable, details of automation tools used in the process. | N/A, as discussed in Strengths and Weaknesses: page 15 |
| Effect measures | 12 | Specify for each outcome the effect measure(s) (e.g. risk ratio, mean difference) used in the synthesis or presentation of results. | Model performance: pages 11-12 |
| Synthesis methods | 13a | Describe the processes used to decide which studies were eligible for each synthesis (e.g. tabulating the study intervention characteristics and comparing against the planned groups for each synthesis). | N/A |
| 13b | Describe any methods required to prepare the data for presentation or synthesis, such as handling of missing summary statistics, or data conversions. |
| 13c | Describe any methods used to tabulate or visually display results of individual studies and syntheses. |
| 13d | Describe any methods used to synthesise results and provide a rationale for the choice(s). If meta-analysis was performed, describe the model(s), method(s) to identify the presence and extent of statistical heterogeneity, and software package(s) used. |
| 13e | Describe any methods used to explore possible causes of heterogeneity among study results (e.g. subgroup analysis, meta-regression). |
| 13f | Describe any sensitivity analyses conducted to assess robustness of the synthesised results. |
| Reporting bias assessment | 14 | Describe any methods used to assess risk of bias due to missing results in a synthesis (arising from reporting biases). | N/A |
| Certainty assessment | 15 | Describe any methods used to assess certainty (or confidence) in the body of evidence for an outcome. | N/A |
| Study selection | 16a | Describe the results of the search and selection process, from the number of records identified in the search to the number of studies included in the review, ideally using a flow diagram. | Appendix C |
| 16b | Cite studies that might appear to meet the inclusion criteria, but which were excluded, and explain why they were excluded. | N/A |
| Study characteristics | 17 | Cite each included study and present its characteristics. | Table 2 |
| Risk of bias in studies | 18 | Present assessments of risk of bias for each included study. | N/A |
| Results of individual studies | 19 | For all outcomes, present, for each study: (a) summary statistics for each group (where appropriate) and (b) an effect estimate and its precision (e.g. confidence/credible interval), ideally using structured tables or plots. | Table 4 |
| Results of syntheses | 20a | For each synthesis, briefly summarise the characteristics and risk of bias among contributing studies. | N/A |
| 20b | Present results of all statistical syntheses conducted. If meta-analysis was done, present for each the summary estimate and its precision (e.g. confidence/credible interval) and measures of statistical heterogeneity. If comparing groups, describe the direction of the effect. |
| 20c | Present results of all investigations of possible causes of heterogeneity among study results. |
| 20d | Present results of all sensitivity analyses conducted to assess the robustness of the synthesised results. |
| Reporting biases | 21 | Present assessments of risk of bias due to missing results (arising from reporting biases) for each synthesis assessed. | N/A |
| Certainty of evidence | 22 | Present assessments of certainty (or confidence) in the body of evidence for each outcome assessed. | N/A |
| Discussion | 23a | Provide a general interpretation of the results in the context of other evidence. | Summary of Findings: pages 12-13, and Results in Context: page 13 |
| 23b | Discuss any limitations of the evidence included in the review. | N/A |
| 23c | Discuss any limitations of the review processes used. | Strengths and Weaknesses: pages 14-15 |
| 23d | Discuss implications of the results for practice, policy, and future research. | Results in Context: page 13, and Strengths and Weaknesses: pages 14-15 |
| Registration and protocol | 24a | Provide registration information for the review, including register name and registration number, or state that the review was not registered. | N/A |
| 24b | Indicate where the review protocol can be accessed, or state that a protocol was not prepared. |
| 24c | Describe and explain any amendments to information provided at registration or in the protocol. |
| Support | 25 | Describe sources of financial or non-financial support for the review, and the role of the funders or sponsors in the review. | Disclose: page 15 |
| Competing interests | 26 | Declare any competing interests of review authors. | Disclose: page 15 |
| Availability of data, code, and other materials | 27 | Report which of the following are publicly available and where they can be found: template data collection forms; data extracted from included studies; data used for all analyses; analytic code; any other materials used in the review. | N/A |

# Appendix B: Search strategy

**PubMed**

| **Search number** | **Query** |
| --- | --- |
| 1 | asthma/[MeSH Terms] |
| 2 | asthma[Title/Abstract] |
| 3 | "acute asthma"[Title/abstract:~4] |
| 4 | exacerbat*[Title/Abstract] |
| 5 | #1 OR #2 |
| 6 | #4 AND #5 |
| 7 | "attack asthma"[Title/abstract:~3] |
| 8 | "severe asthma"[Title/Abstract:~3] OR "severe asthma*"[Title/Abstract] |
| 9 | hospitali* asthma[Title/Abstract] |
| 10 | "adverse asthma"[Title/Abstract:~3] |
| 11 | #3 or #6 or #7 or #8 or #9 or #10 |
| 12 | (Validat*[Text Word]) OR (Predict*[Title]) OR (Rule*[Text Word]) |
| 13 | ((Predict*[Text Word] AND (Outcome*[Text Word] OR Risk*[Text Word] OR Model*[Text Word])) OR ((History[Text Word] OR Variable*[Text Word] OR Criteria[Text Word] OR Scor*[Text Word] OR Characteristic*[Text Word] OR Finding*[Text Word] OR Factor*[Text Word]) AND (Predict*[Text Word] OR Model*[Text Word] OR Decision*[Text Word] OR Identif*[Text Word] OR Prognos*[Text Word]))) |
| 14 | (Decision*[Text Word]) AND ((Model*[Text Word] OR Clinical*[Text Word]) OR (Models, Statistical[MeSH Terms])) OR (Prognostic[Text Word] AND (History[Text Word] OR Variable*[Text Word] OR Criteria[Text Word] OR Scor*[Text Word] OR Characteristic*[Text Word] OR Finding*[Text Word] OR Factor*[Text Word] OR Model*[Text Word])) |
| 15 | ROC curve[MeSH Terms] |
| 16 | Stratification[Text Word] OR Discrimination[Text Word] OR Discriminate[Text Word] OR c-statistic[Text Word] OR "c statistic"[Text Word] OR "Area under the curve"[Text Word] OR AUC[Text Word] OR Calibration[Text Word] OR Indices[Text Word] OR Algorithm[Text Word] OR Multivariable[Text Word] OR precision[Text Word] OR recall[Text Word] OR "F1 score"[Text Word] OR "sensitivity"[Text Word] OR "specificity"[Text Word] "confusion matrix"[Text Word] OR "contingency table"[Text Word] or "false positive"[Text Word] or "false negative"[Text Word] or "true positive"[Text Word] or "true negative"[Text Word] |
| 17 | #12 or #13 or #14 or #15 or #16 |
| 18 | ("child"[MeSH Terms] OR "pediatrics"[MeSH Terms] OR "adolescent"[MeSH Terms] OR "adult children"[MeSH Terms] OR "minors"[MeSH Terms] OR "adolescent, hospitalized"[MeSH Terms] OR "child, hospitalized"[MeSH Terms] OR "child*"[Text Word] OR "pediat*"[Text Word] OR "boy"[Text Word] OR "girl*"[Text Word] OR "schoolchild*"[Text Word] OR "kid"[Text Word] OR "juvenil*"[Text Word] OR "youth*"[Text Word] OR "prepubescen*"[Text Word] OR "prepubert*"[Text Word] OR "schoolage*"[Text Word] OR "school age*"[Text Word] OR "teens"[Text Word] OR "teen"[Text Word] OR "teenage*"[Text Word] OR "youth"[Text Word] OR "youths"[Text Word] OR "adolescen*"[Text Word] OR "pubescen*"[Text Word] OR "underage*"[Text Word] OR "minors"[Text Word]) OR adolescen*[Journal] OR pediatric*[Journal] OR paediatric*[Journal] OR adolescen*[Journal] |
| 19 | Adult[MeSH Terms] |
| 20 | adult[Title/Abstract] |
| 21 | #19 OR #20 |
| 22 | #11 AND #17 |
| 23 | #22 not (#18 not (#18 and #21)) |
| 24 | case reports[Publication Type] |
| 25 | letter[Publication Type] |
| 26 | review[Publication Type] or "systematic review"[Publication Type] |
| 27 | #24 OR #25 OR #26 |
| 28 | #23 not #27 |
| 29 | protocol[Title] OR correction[Title] OR cross-sectional[Title] |
| 30 | #28 not #29 |

**EMBASE**

| **Search**  **number** | **Query** |
| --- | --- |
| 1 | exp asthma/ |
| 2 | asthma.ti,ab,ot. |
| 3 | (Acute adj4 asthma).ti,ab,ot. |
| 4 | exacerbat*.ti,ab,ot. |
| 5 | 1 or 2 |
| 6 | 4 and 5 |
| 7 | (attack adj3 asthma).ti,ab,ot. |
| 8 | ((severe* adj3 asthma*) or (severe adj3 asthma)).ti,ab,ot. |
| 9 | (hospitali* adj3 asthma).ti,ab,ot. |
| 10 | (adverse adj3 asthma).ti,ab,ot. |
| 11 | 3 or 6 or 7 or 8 or 9 or 10 |
| 12 | Validat$.tw. or Predict$.ti. or Rule$.tw. |
| 13 | ((Predict$ and (Outcome$ or Risk$ or Model$)) or ((History or Variable$ or Criteria or Scor$ or Characteristic$ or Finding$ or Factor$) and (Predict$ or Model$ or Decision$ or Identif$ or Prognos$))).tw. |
| 14 | (Decision$.tw. and ((Model$ or Clinical$).tw. or statistical model/)) or (Prognostic and (History or Variable$ or Criteria or Scor$ or Characteristic$ or Finding$ or Factor$ or Model$)).tw. |
| 15 | exp receiver operating characteristic/ |
| 16 | ("Stratification" or "Discrimination" or "Discriminate" or "c-statistic" or "c statistic" or "Area under the curve" or "AUC" or "Calibration" or "Indices" or "Algorithm" or "Multivariable" or "precision" or "recall" or "F1 score" or "confusion matrix" or "contingency table" or "false positive" or "false negative" or "true positive" or "true negative").tw. |
| 17 | 12 or 13 or 14 or 15 or 16 |
| 18 | 11 and 17 |
| 19 | child/ |
| 20 | (child* or Pediatric*).ti,ab,ot. |
| 21 | pediatrics.mp. or exp pediatrics/ |
| 22 | child*.mp. |
| 23 | 19 or 20 or 21 or 22 |
| 24 | adult/ |
| 25 | adult.ti,ab,ot. |
| 26 | 24 or 25 |
| 27 | 18 not (23 not (23 and 26)) |
| 28 | CONFERENCE ABSTRACT.pt. |
| 29 | case report/ |
| 30 | letter/ |
| 31 | editorial/ |
| 32 | (review or systematic review).pt. |
| 33 | 28 or 29 or 30 or 31 or 32 |
| 34 | 27 not 33 |
| 35 | (protocol or correction or cross-sectional).ti. |
| 36 | 34 not 35 |

# Appendix C: Study Selection

**Identification**

Studies screened **(n = 9067)**

Studies assessed for eligibility **(n = 46)**

Duplicate references removed **(n = 9820)**

Studies excluded **(n = 9021)**

Studies excluded **(n = 21)**

Wrong setting (n = 6)

Wrong outcomes (n = 9)

Simple predictor variable (n = 3)

No model performance measures (n = 2)

Non-longitudinal study (cross-sectional study) (n = 1)

**Included**

Studies included in review **(n = 25)**

**Screening**

Studies from databases **(n = 18887)**

PubMed (n = 11931)

Embase (n = 6956)

# Appendix D: Data Extraction

| Data Extraction Category | Data Extraction Item | Notes |
| --- | --- | --- |
| Study Characteristics | Authors |  |
| Study title |  |
| Year |  |
| Country of data collection |  |
| Study ID | Typically the author of the lead surname, followed with [A] or [B] in the cases of multiple papers with the same first author. |
| Study Population | Inclusion criteria |  |
| Study Outcome | How many outcomes assessed |  |
| Outcome ascertainment |  |
| Outcome event horizon | The maximum duration, or censoring time, between the index date (at which point the predictive features were recorded) and the outcome event. |
| Outcome incidence |  |
| Modelling | Multiple models developed? |  |
| Distinguishing characteristics between multiple models in the same study |  |
| Area under the curve reported? |  |
| Binary classification measures reported |  |
| Could further binary classification measures be derived from the present information? (list the data if so) |  |
| Model selection process |  |
| Algorithms tested |  |
| Algorithm for final selected model |  |
| Model validation procedures |  |
